# Supplementary material for: Green SDG-Based Remediation of Sugarcane Vinasse via HA–nCaO: Integrating Computational Sustainability Evaluation with Innovative COD Removal, Organic Load, and pH Control
Source: Research Square preprint supplement (doi:10.21203/rs.3.rs-7285242/v1), 2025-08-12
Supplement: Supplementary file 2 [file acc5fae859bd492eff59166c.docx]

**Table 1: Surface area and porosity data from BET analysis.**

| Material | BET Surface Area (m²/g) | Average Pore Size (nm) | Total Pore Volume (cm³/g) |
| --- | --- | --- | --- |
| CaO | 41.8 | 5.2 | 0.11 |
| HA–nCaO | **112.6** | **8.3** | **0.21** |

**Table 2: Zeta potential values at different pH levels.**

| pH | Zeta Potential (mV) |
| --- | --- |
| 3 | –12.4 |
| 5 | –18.9 |
| 7 | –27.6 |
| 9 | –23.1 |
| 11 | –17.8 |

**Table 3**: **Initial and final pH values and pollutant removal summary under optimal conditions.**

| Parameter | Initial Value | Final Value / Efficiency |
| --- | --- | --- |
| pH | 4.3 | 7.6 ± 0.2 |
| COD (mg/L) | 25,000 | 4,400 (82.4%) |
| TOC (mg/L) | 9,500 | 2,275 (76.1%) |
| Color (Abs @475 nm) | 3.00 | 0.315 (89.5%) |

### **Table 4: Kinetic Parameters for COD Adsorption onto HA–nCaO derived from model fitting.**

| Model | k (Rate Constant) | qe,calc (mg/g) | q e,exp (mg/g) | R² |
| --- | --- | --- | --- | --- |
| Pseudo-First-Order | 0.0231 min⁻¹ | 339.5 | 416.3 | 0.872 |
| Pseudo-Second-Order | 6.18 × 10⁻⁵ g/mg·min | 402.3 | 416.3 | **0.991** |

**Table 5: Isotherm Constants and Model Fitting Results**

| Model | Constants | Value | R² |
| --- | --- | --- | --- |
| ****Langmuir**** | qmax (mg/g) | 416.3 | **0.988** |
|  | b (L/mg) | 0.0051 |  |
|  | RL (10,000–35,000 mg/L range) | 0.12 – 0.33 (favorable) |  |
| ****Freundlich**** | KF ((mg/g)(L/mg1/n) | 52.6 | 0.932 |
|  | n (dimensionless) | 2.34 (favorable; n > 1) |  |

**Table 6: Thermodynamic Parameters (ΔG°, ΔH°, ΔS°) for COD Adsorption calculated at three temperatures.**

| Temperature (K) | ΔG° (kJ/mol) | ΔH° (kJ/mol) | | ΔS° (J/mol·K) | |
| --- | --- | --- | --- | --- | --- |
| 298 | –12.5 | +28.3 | +135.2 | | |
| 308 | –14.2 |  | | |  |
| 318 | –15.7 |  |  | | |

### **Table 7: Reusability Showing Performance Metrics Across Successive Cycles**

| Cycle No. | COD Removal (%) | TOC Removal (%) | Color Removal (%) | Final pH |
| --- | --- | --- | --- | --- |
| 1 | 82.4 | 76.1 | 89.5 | 7.6 ± 0.2 |
| 2 | 77.3 | 70.5 | 83.8 | 7.4 |
| 3 | 72.1 | 66.0 | 77.6 | 7.3 |
| 4 | 68.7 | 63.2 | 71.3 | 7.1 |
